# Supplementary material for: Barriers, Facilitators and Preferences for HIV Testing Services among Adolescent Girls (15-19) and Young Women (20-24) in Rakai District, Central Uganda
Source: Research Square preprint supplement (doi:10.21203/rs.3.rs-6744863/v1), 2025-07-14

**ENGLISH\_INDEPTH INTERVIEW (IDI) GUIDE FOR  
the study on Experiences, Uptake & Cost-Effectiveness of HIV Testing  
Service Strategies Among Adolescent Girls and Young Women in the  
Greater Rakai District, Uganda**

**FOR OFFICIAL USE ONLY**

Date of interview: \_\_\_\_/\_\_\_\_/\_\_\_\_

Name of district: \_\_\_\_\_

Venue: \_\_\_\_\_

Language of interview: \_\_\_\_\_

Category of participants: \_\_\_\_\_

Time started: \_\_\_\_\_ Time ended: \_\_\_\_\_

Take other Demographics:

**A. IDI INTRODUCTORY QUESTION**

1. Tell me about yourself and how long you have lived in this community.

**B. KNOWLEDGE/ AWARENESS OF HTS STRATEGIES**

- a. How did you learn about HTS for adolescents?
- b. What initially motivated you to test for HIV?
- c. Did you have any concerns about taking HIV test?
- d. How did people in this community initially react to HTS being utilized by adolescent girls like you
- e. Where did you take the test from? Are you aware of other testing sites (mention)?

**C. HIV TESTING EXPERIENCE**

Let us talk about your experience as a young girl when you took an HIV test.

2. Tell me the story of how you conceived the idea to test up to when you tested (process at the facility) and receiving results if you did.

- a. Are there things you liked about HIV Testing Service?

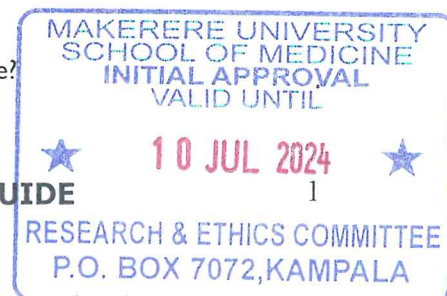

- b. Are there things you dislike about HIV Testing Service?
  - c. Did other people know you are taking HTS? If so, what was their response or reaction to your HTS use?
  - d. What kind of support did you receive from partners, friends, partner if any or colleagues to take an HIV test?
  - e. What do you think people in this community think about HTS for adolescent girls and young women?
3. Can you walk me through some the challenges you have faced taking an HIV test as an adolescent girl if any (other than what you could have mentioned above)?

#### D. RECEIPT OF HIV TEST RESULTS

We have learned that some girls test but do not return to pick their results.

- 4. Have you heard about this? What are some reasons this might be happening?
- 5. Would you recommend HTS to other adolescent girls in this community/school?  
why/why not?

#### E. HTS PREFERENCES

- 6. What would make it easier for you or other girls in this community to take an HIV test?
- 7. Which aspects of HTS do you think should stay the same as they have been?
- 8. Which aspects of HTS do you think should be **changed** from what they have been?
- 9. What advice do you have for US (**researchers/programmers/policy makers**) interested in increasing HTS uptake now and in the future?
- 10. What else would you like us to know about your HTS experience that we have not covered in this interview?
- 11. Before we end the discussion today, are there any other experiences or stories you would like to share about your time taking HTS?

**Thank you.**

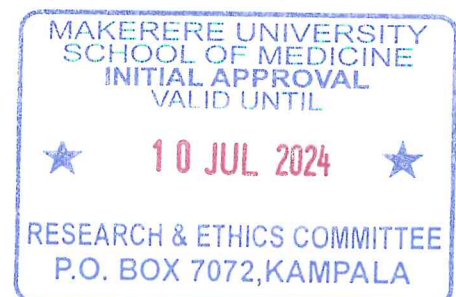

Supplement: Supplementary file 1 [file e4e4ce0c03911267f3f59ce5.pdf]
